# Supplementary material for: Supramolecular Nature of Multicomponent Crystals Formed from 2,2′-Thiodiacetic Acid with 2,6-Diaminopurine or N9-(2-Hydroxyethyl)adenine
Source: MDPI journal article supplement (doi:10.3390/ijms242417381), 2023-12-12

## Supplementary material

### Supramolecular nature of multicomponent crystals formed from 2,2'-thiodiacetic acid with 2,6-diaminopurine or N9-(2-Hydroxyethyl)adenine

Jeannette Carolina Belmont-Sánchez,<sup>1</sup> Duane Choquesillo-Lazarte,<sup>2</sup> María Eugenia García-Rubiño,<sup>3</sup> Antonio Matilla-Hernández,<sup>1</sup> Juan Niclós-Gutiérrez,<sup>1</sup> Alfonso Castiñeiras,<sup>4,\*</sup> Antonio Frontera<sup>5</sup>

## Contents

|                                                                                                                                            |           |
|--------------------------------------------------------------------------------------------------------------------------------------------|-----------|
| <b>S1.</b> Crystals of [(H9Heade <sup>+</sup> )(Htda <sup>-</sup> )], <b>1</b> .                                                           | 2         |
| <b>S2.</b> FT-IR spectrum of [(H9Heade <sup>+</sup> )(Htda <sup>-</sup> )], <b>1</b> .                                                     | 3         |
| <b>S3.</b> FT-IR spectrum of [(H <sub>2</sub> dap <sup>+</sup> ) <sub>2</sub> (tda <sup>2-</sup> )]·2H <sub>2</sub> O, <b>2</b> .          | 3         |
| <b>S4.</b> Thermogravimetric analysis [(H9Heade <sup>+</sup> )(Htda <sup>-</sup> )], <b>1</b> .                                            | 4         |
| <b>S5.</b> Thermogravimetric analysis [(H <sub>2</sub> dap <sup>+</sup> ) <sub>2</sub> (tda <sup>2-</sup> )]·2H <sub>2</sub> O, <b>2</b> . | 10        |
| <b>S6.</b> Thermogravimetric analysis of the reagents used in this work.                                                                   | 16        |
| <b>S6.1.</b> TGA of 2,2'-Thiodiacetic acid, H <sub>2</sub> tda (powder, 98 %).                                                             | 16        |
| <b>S6.2.</b> TGA of 2,6-diaminopurine, Hdap (powder, 98 %).                                                                                | 17        |
| <b>S6.3.</b> TGA of N9-(2-hydroxyethyl)adenine, 9heade (powder, 98%).                                                                      | 18        |
| <b>S7.</b> DSC curve for [(H9Heade <sup>+</sup> )(Htda <sup>-</sup> )], <b>1</b> .                                                         | 19        |
| <b>S8.</b> DSC curve for [(H <sub>2</sub> dap <sup>+</sup> ) <sub>2</sub> (tda <sup>2-</sup> )]·2H <sub>2</sub> O, <b>2</b> .              | 20        |
| <b>S9.</b> 1H NMR spectrum in D <sub>2</sub> O of <b>1</b> .                                                                               | <b>21</b> |
| <b>S10.</b> 1H NMR spectrum in D <sub>2</sub> O of <b>2</b> .                                                                              | <b>21</b> |
| <b>S11.</b> 13C NMR spectrum in D <sub>2</sub> O of <b>1</b> .                                                                             | <b>22</b> |
| <b>S12.</b> 13C NMR spectrum in D <sub>2</sub> O of <b>2</b> .                                                                             | <b>22</b> |

**SM1.** Crystals of  $[(H_9Heade^+)(Htda^-)]$ , **1**.

Three photos taken from dissolution using polarized light.

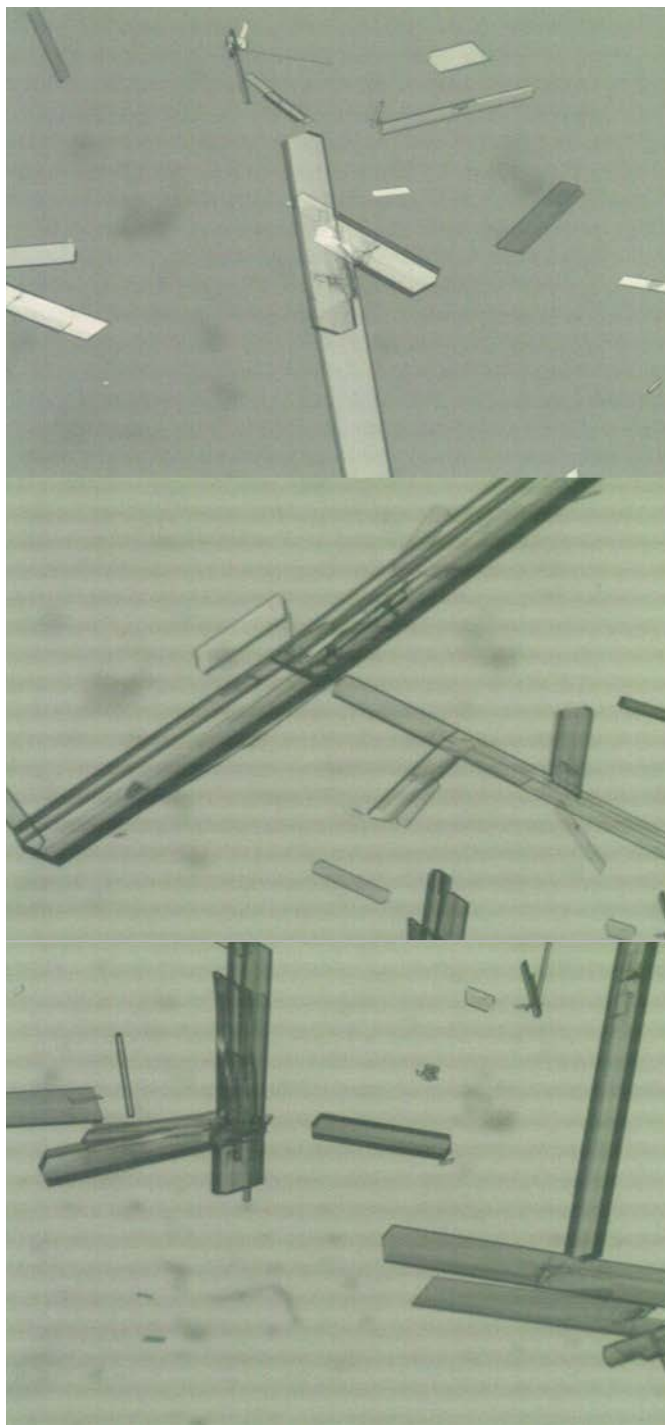

## S2. FT-IR spectrum of $[(H9Heade^+)(Htda^-)]$ , 1.

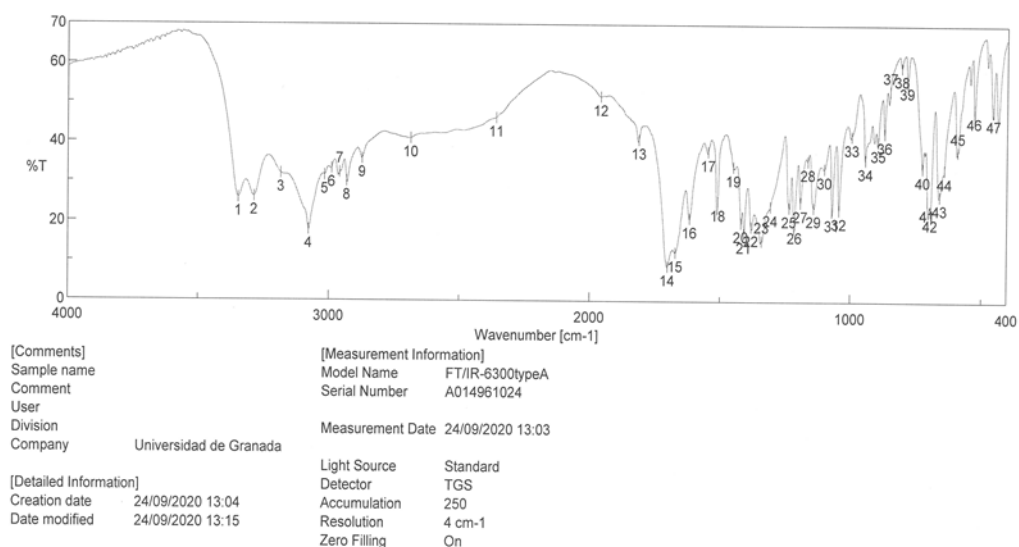

### [ Result of Peak Picking ]

| No. | Position | Intensity |
|-----|----------|-----------|-----|----------|-----------|-----|----------|-----------|-----|----------|-----------|
| 1   | 3346.85  | 25.8278   | 2   | 3286.11  | 26.1388   | 3   | 3183.9   | 31.9825   | 4   | 3077.83  | 17.822    |
| 5   | 3017.09  | 31.5049   | 6   | 2990.09  | 33.2463   | 7   | 2960.2   | 32.2425   | 8   | 2933.2   | 30.0184   |
| 9   | 2874.38  | 35.7607   | 10  | 2687.32  | 40.853    | 11  | 2361.41  | 46.1118   | 12  | 1961.25  | 51.4987   |
| 13  | 1814.69  | 40.6359   | 14  | 1701.87  | 8.79292   | 15  | 1671.98  | 12.3455   | 16  | 1617.98  | 20.8418   |
| 17  | 1547.59  | 37.6702   | 18  | 1509.99  | 25.1798   | 19  | 1451.17  | 33.8374   | 20  | 1421.28  | 19.7925   |
| 21  | 1409.71  | 17.1302   | 22  | 1382.71  | 18.8702   | 23  | 1342.21  | 15.3393   | 24  | 1308.46  | 23.9639   |
| 25  | 1236.15  | 23.7005   | 26  | 1213.97  | 19.7392   | 27  | 1192.76  | 25.0113   | 28  | 1163.83  | 35.3991   |
| 29  | 1141.65  | 23.774    | 30  | 1100.19  | 33.5416   | 31  | 1071.26  | 22.8015   | 32  | 1044.26  | 23.1516   |
| 33  | 997.017  | 41.7009   | 34  | 944.949  | 35.6892   | 35  | 896.737  | 40.3044   | 36  | 872.631  | 42.3984   |
| 37  | 852.382  | 53.2422   | 38  | 808.992  | 59.2704   | 39  | 788.743  | 56.2663   | 40  | 727.996  | 33.7208   |
| 41  | 709.676  | 25.4879   | 42  | 698.105  | 22.9798   | 43  | 662.428  | 26.6234   | 44  | 644.108  | 33.369    |
| 45  | 593.968  | 37.927    | 46  | 531.293  | 48.6719   | 47  | 456.082  | 48.1124   |     |          |           |

## S3. FT-IR spectrum of $[(H_2dap^+)_2(tda^{2-})] \cdot 2H_2O$ , 2.

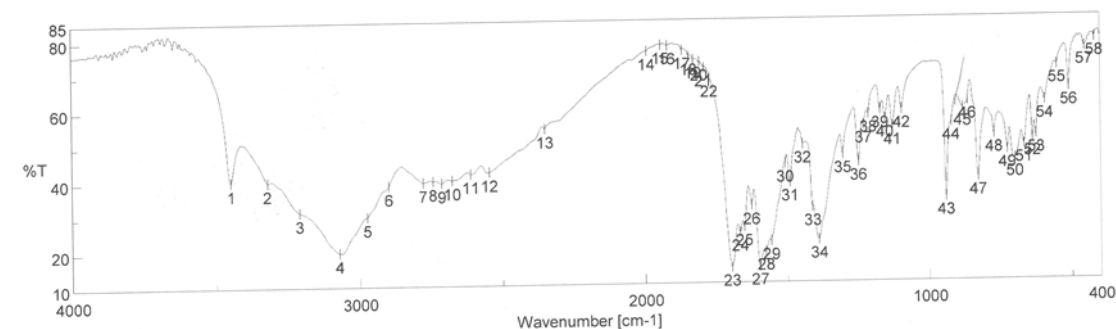

### [ Result of Peak Picking ]

| No. | Position | Intensity | No. | Position | Intensity | No. | Position | Intensity |
|-----|----------|-----------|-----|----------|-----------|-----|----------|-----------|
| ①   | 3448.1   | 40.1847   | ②   | 3319.86  | 40.0203   | ③   | 3208.97  | 31.4661   |
| ④   | 3071.08  | 19.8961   | ⑤   | 2972.73  | 29.997    | ⑥   | 2896.56  | 38.6918   |
| ⑦   | 2776.03  | 39.5604   | 8   | 2742.28  | 39.9196   | 9   | 2711.42  | 39.3353   |
| 10  | 2674.78  | 40.1364   | 11  | 2610.18  | 41.8786   | 12  | 2545.58  | 42.2944   |
| 13  | 2348.87  | 54.3515   | 14  | 1992.11  | 76.0618   | 15  | 1942.93  | 77.7301   |
| 16  | 1920.75  | 77.612    | 17  | 1867.72  | 76.2356   | 18  | 1844.58  | 74.4644   |
| 19  | 1829.15  | 73.5038   | 20  | 1807.94  | 72.8565   | 21  | 1792.51  | 71.1755   |
| 22  | 1772.26  | 68.1629   | 23  | 1697.05  | 14.477    | 24  | 1667.16  | 24.3562   |
| ②⑤  | 1652.7   | 25.9281   | ②⑥  | 1626.66  | 31.8799   | ②⑦  | 1597.73  | 14.7093   |
| ②⑧  | 1576.52  | 18.9009   | ②⑨  | 1558.2   | 21.842    | ③⑩  | 1508.06  | 43.7791   |
| 31  | 1491.67  | 38.4566   | 32  | 1446.35  | 49.1221   | 33  | 1412.6   | 31.3347   |
| ③④  | 1390.42  | 22.1055   | 35  | 1306.54  | 46.1441   | 36  | 1250.61  | 44.0036   |
| 37  | 1232.29  | 54.4746   | 38  | 1214.93  | 57.4845   | 39  | 1172.51  | 58.6732   |
| 40  | 1155.15  | 56.0337   | 41  | 1129.12  | 53.8631   | 42  | 1096.33  | 58.632    |
| ④③  | 940.128  | 33.8832   | 44  | 921.807  | 54.961    | ④⑤  | 882.274  | 58.944    |
| ④⑥  | 864.917  | 60.9789   | 47  | 829.241  | 39.4057   | 48  | 772.351  | 51.4607   |
| 49  | 726.068  | 47.0549   | 50  | 700.034  | 44.4952   | 51  | 668.214  | 48.4501   |

**S4.** Thermogravimetric analysis (TGA) of [(H9Heade+)(Htda-)], **1**.

**S4.1.** Weight loss and data to estimate the final residual for **1**.

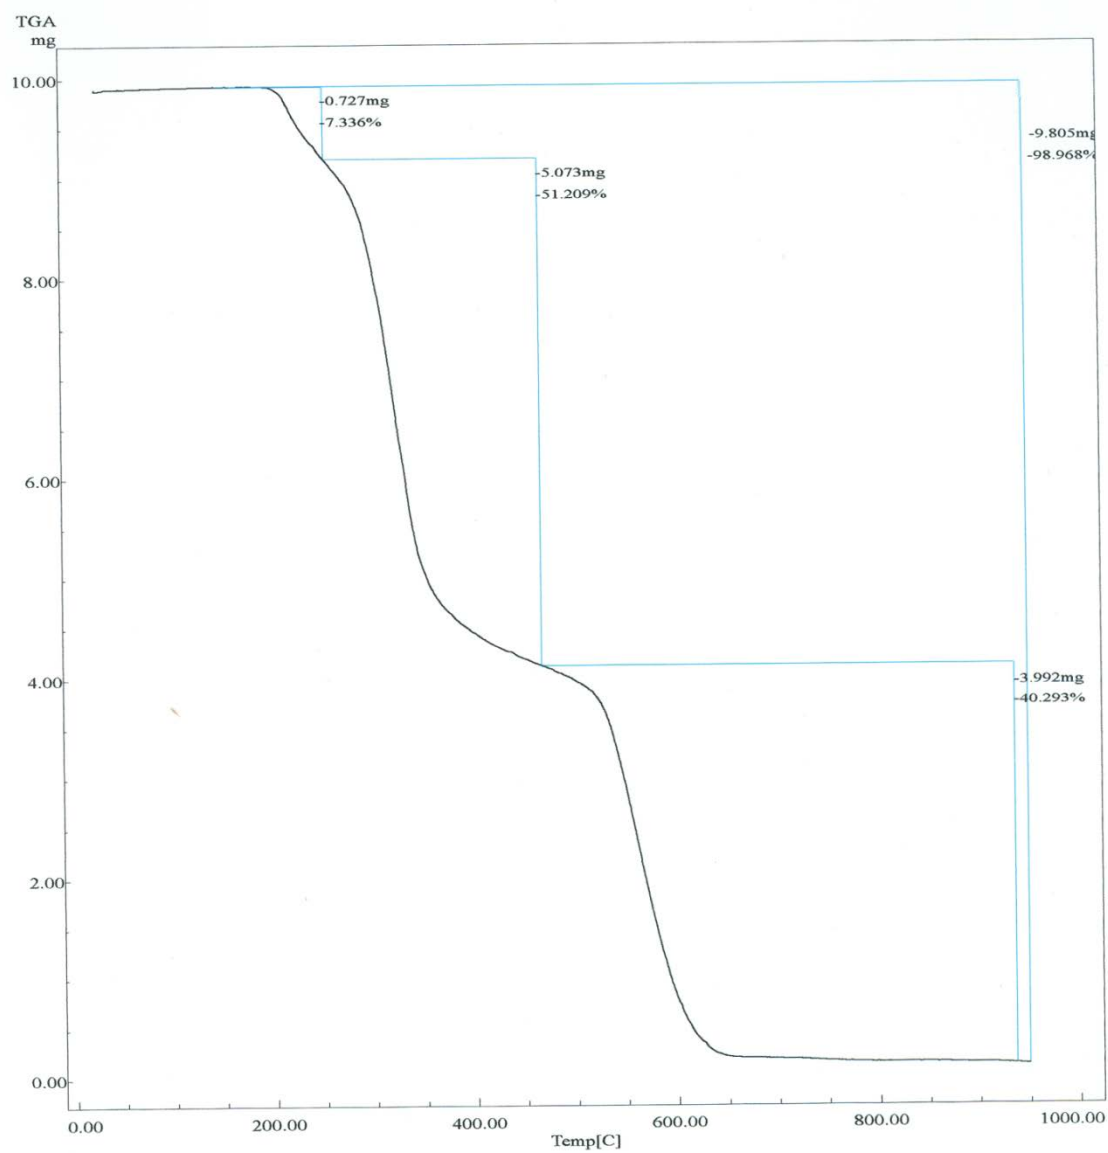

## S4.2. FT-IR spectra of standard gases to identify evolved gases in TGA of 1.

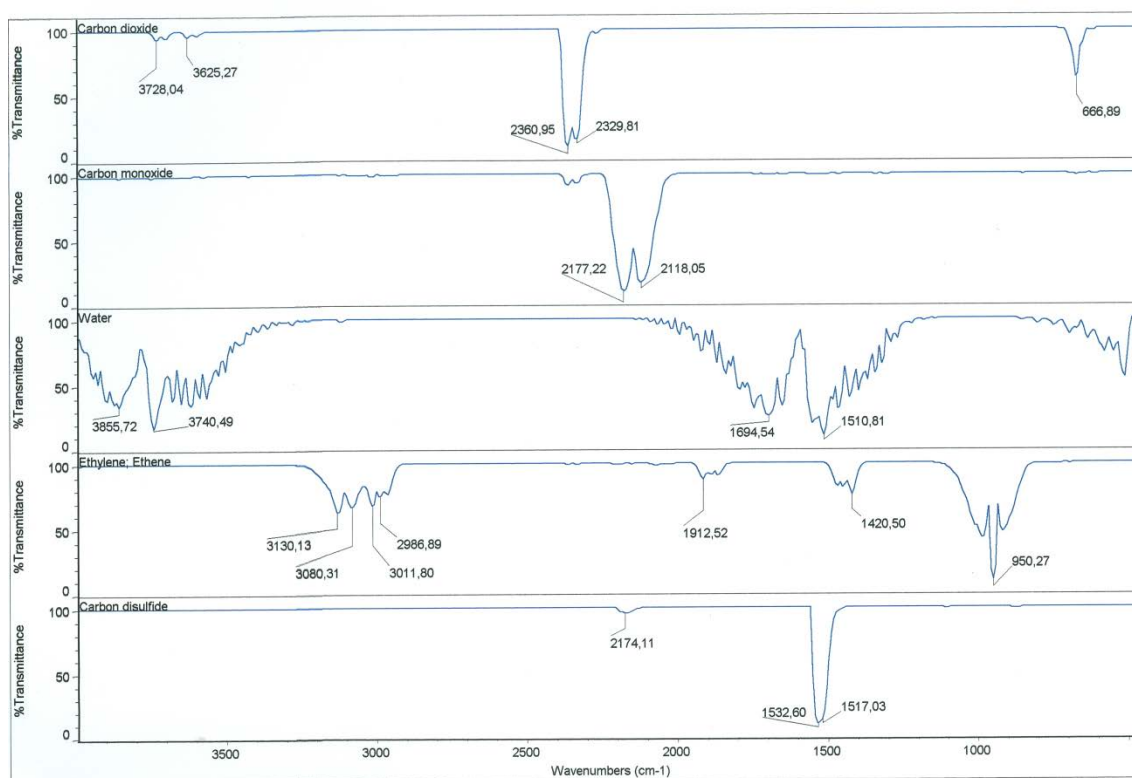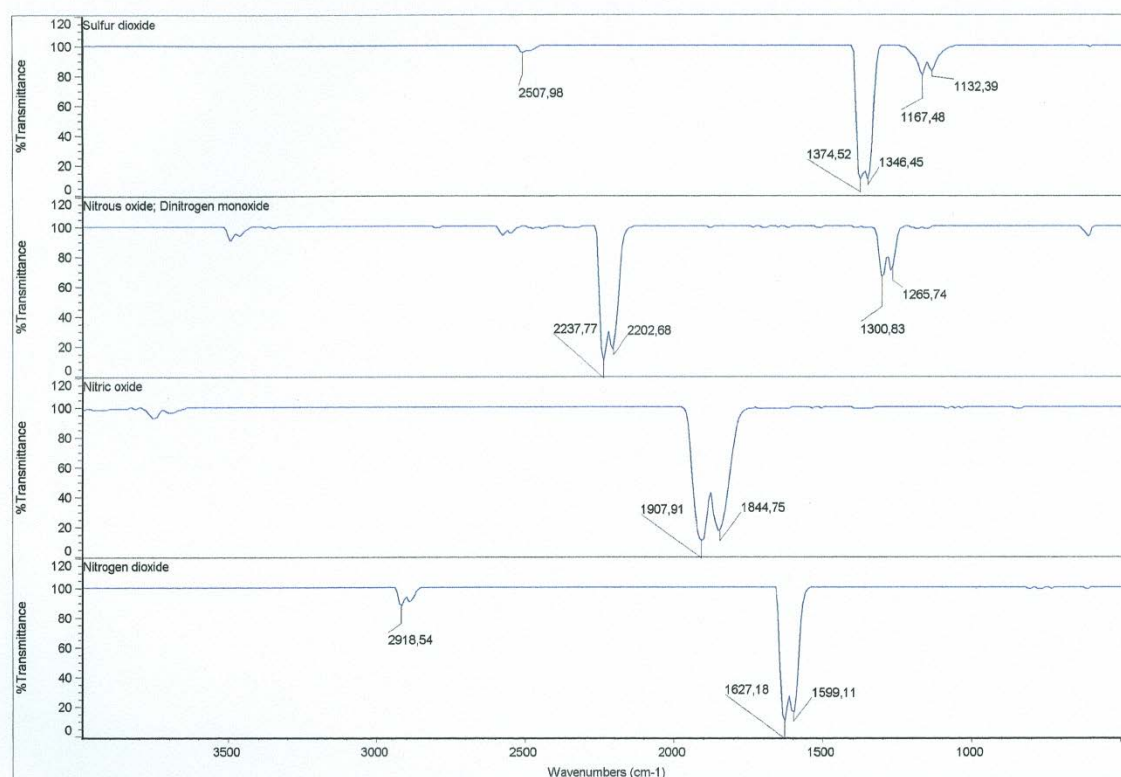

### S4.3. Time-spaced FT-IR spectra to identify the evolved gases in the TGA of 1.

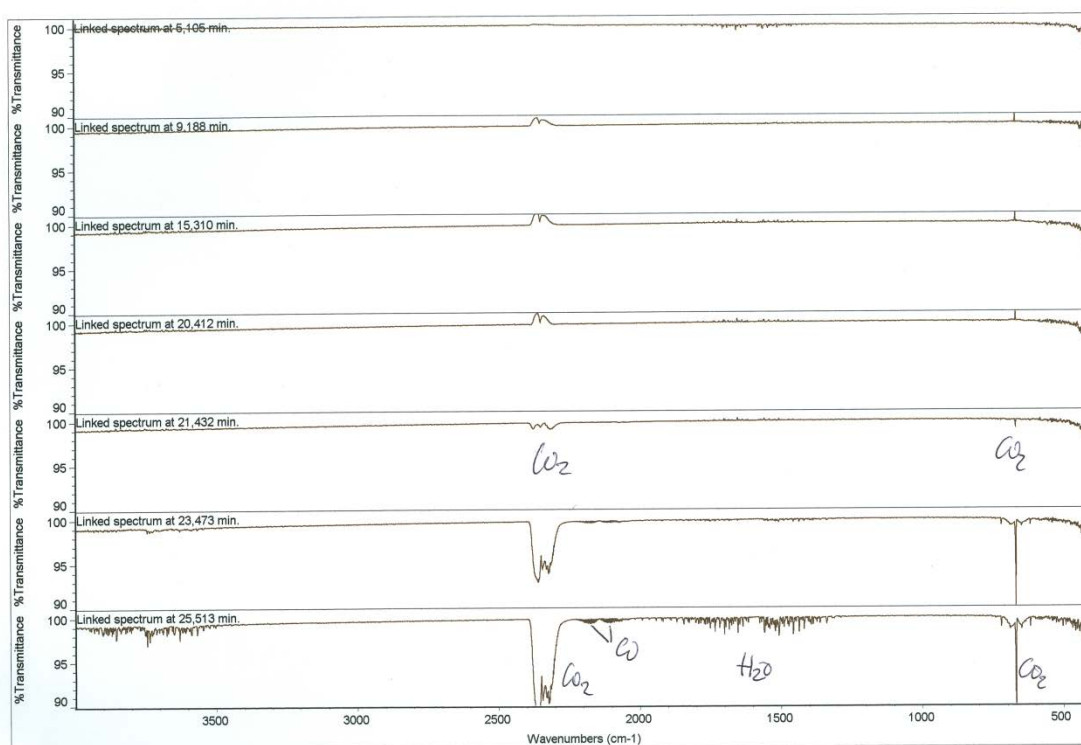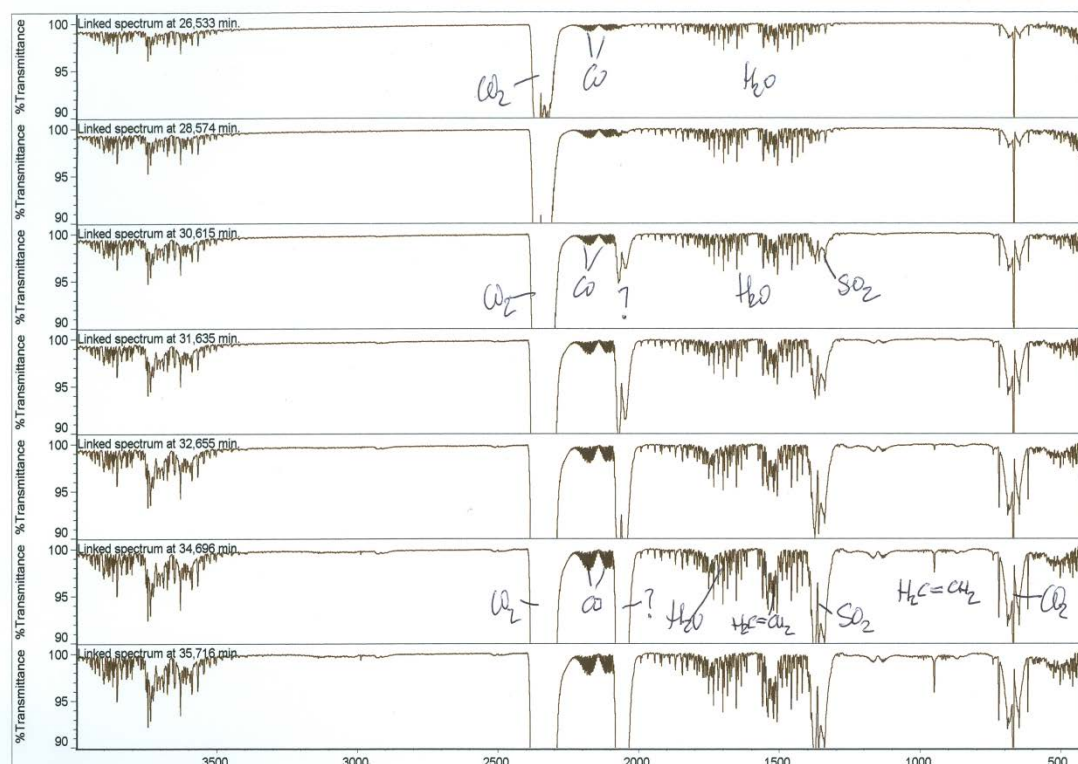



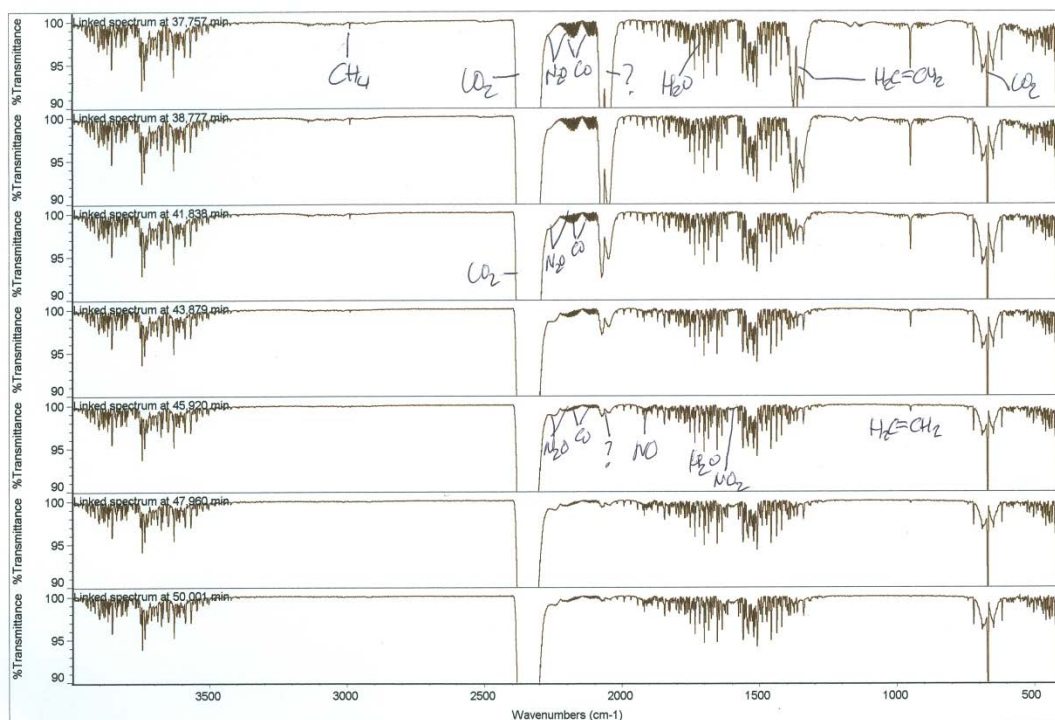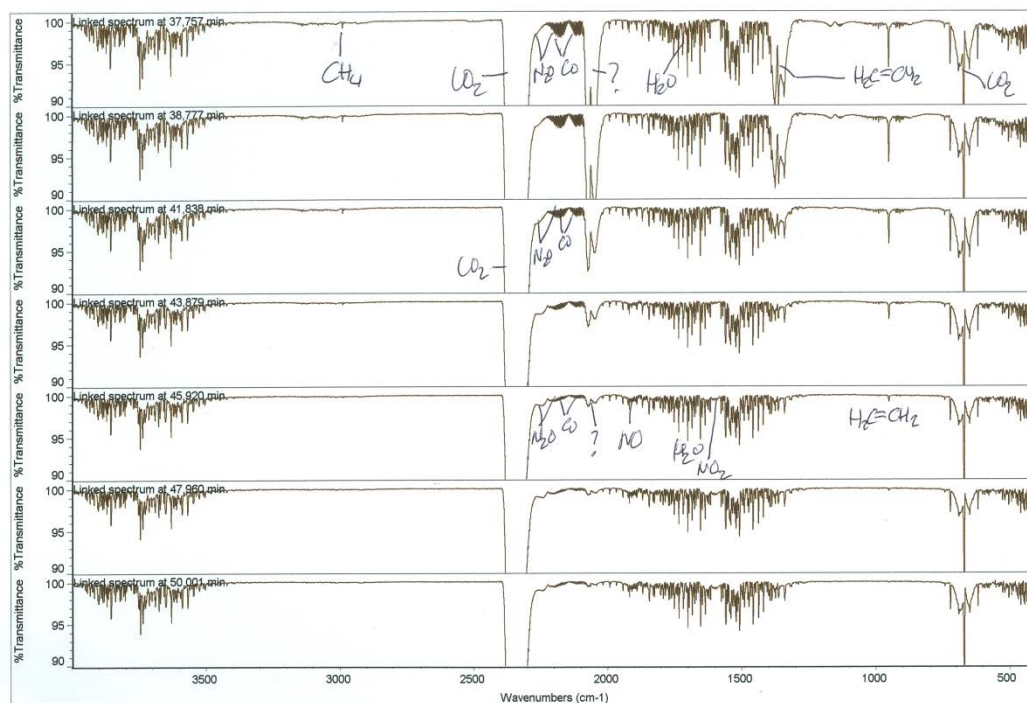

9

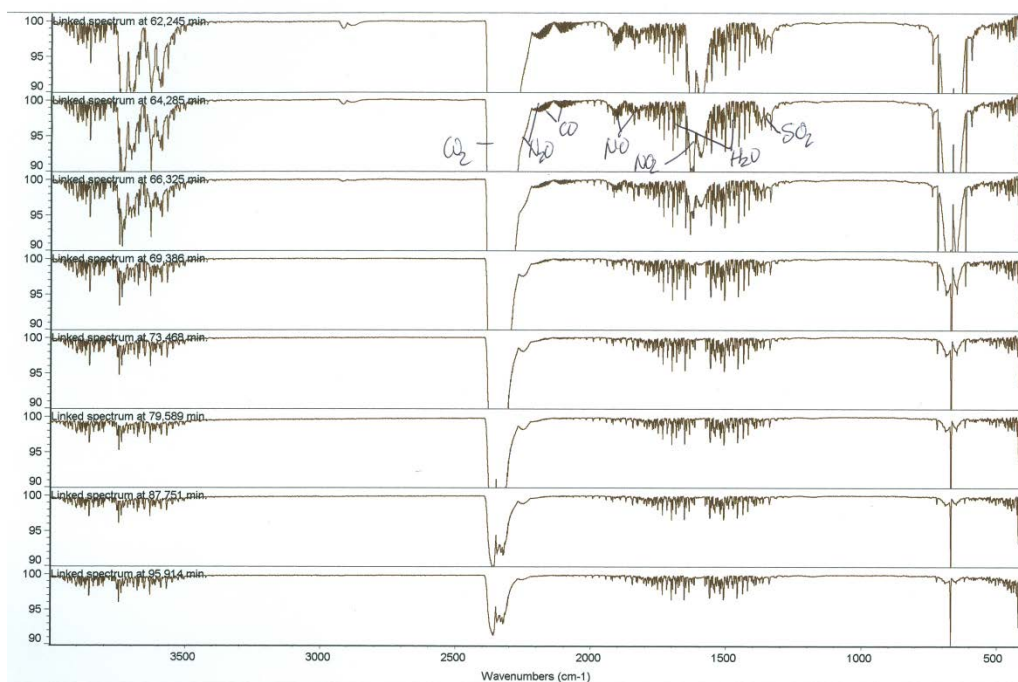

**S4.4.** Selected FT-IR spectra to identify the evolved gases in the TGA of 1. Second (up) and third (down) steps.

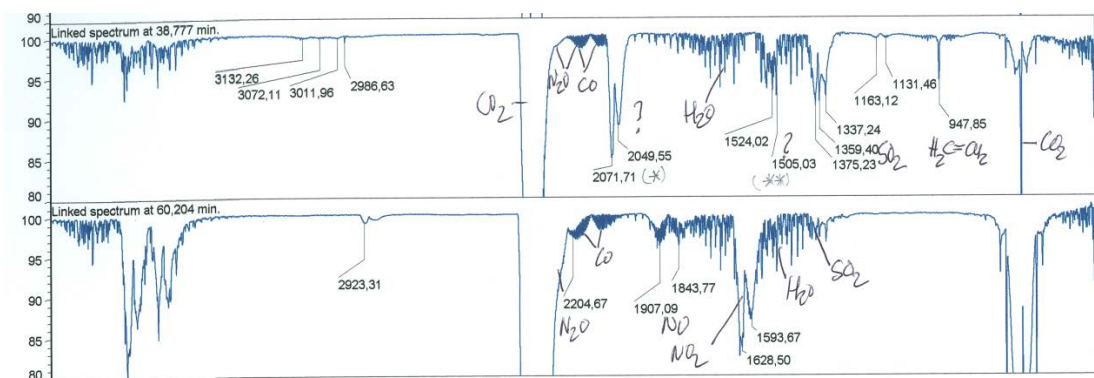



#### S4.5. Summary of results and Comments on TGA of **1**.

| Step    | Temperature °C | Time min | % Observed Weight Loss | Gases or final residue                                                                                                     |
|---------|----------------|----------|------------------------|----------------------------------------------------------------------------------------------------------------------------|
| 1       | <b>180-250</b> | 14-23    | 7.336                  | H <sub>2</sub> O, CO <sub>2</sub>                                                                                          |
| 2       | <b>250-465</b> | 23-44    | 51.209                 | H <sub>2</sub> O, CO <sub>2</sub> , CO, X**, SO <sub>2</sub> ,<br>H <sub>2</sub> C=CH <sub>2</sub> , N <sub>2</sub> O (t*) |
| 3       | <b>465-650</b> | 44-66    | 40.293                 | H <sub>2</sub> O, CO <sub>2</sub> , CO,<br>N <sub>2</sub> O, NO, NO <sub>2</sub>                                           |
| Residue | <b>650-950</b> | 93       | 1.032                  | Undetermined                                                                                                               |

\* t = Trace amounts. \*\* X = Unidentified gas.

##### Comments:

Compound **1** exhibits rather high stability. Its decomposition initiates at 180°C. In the first step, it releases only H<sub>2</sub>O and CO<sub>2</sub>. The gases evolved during the second step primarily indicate the combustion of the Htda<sup>-</sup> counter-anion, potentially accompanied by a partial decomposition of the N9-(2-hydroxyethyl) arm from the H9heade<sup>+</sup> cation, resulting in the production of ethylene and small quantities of N<sub>2</sub>O. Subsequently, the final step, among others gases produced, the three common N-oxides, are generated, primarily due to the combustion of the purine moiety from 9heade. Notably absent are the typical peaks around 970 and 930 cm<sup>-1</sup>, associated with ammonia loss. Furthermore, this absence cannot be attributed solely to the high temperatures (>450 °C) of the third step, as all the three steps promote N-oxide formation. Indeed the thermogravimetric analysis of molecular 9heade (not shown here) revealed an initial weight loss >96% (215-420°C) releasing H<sub>2</sub>O, CO<sub>2</sub>, CO and N<sub>2</sub>O (without produce ammonia), followed by a second step (420-625°C) producing these gases alongside NO and NO<sub>2</sub>. The majority of the weight loss in compound **1** occurs below 700°C. Additionally, the chemical purity of the tested sample is affirmed by the low final residue (~1%) at 950 °C.

##### \*Comments:

Compound **1** initiates its decomposition at 180-250°C, resulting in a weight loss of 7.34% releasing H<sub>2</sub>O and CO<sub>2</sub>. This is followed by distinct phase between 250-465°C, accounting for 51.12 % of weight loss, characterized by the generation of H<sub>2</sub>O, CO<sub>2</sub>, CO, SO<sub>2</sub>, H<sub>2</sub>C=CH<sub>2</sub> and potentially HSCN along with some N<sub>2</sub>O. A subsequent step from 465-650°C, responsible for 40.19% of weight loss, produces H<sub>2</sub>O, CO<sub>2</sub>, CO, and N-oxides (N<sub>2</sub>O, NO and NO<sub>2</sub>) excluding NH<sub>3</sub>. A stable but minor residue forms (1.16% or 1.03% at 650 or 950°C, respectively). These findings are indicative of a partially overlapping combustion of both ligands and are consistent with the anticipated stability of the purine moiety of 9heade.

**S5.** Thermogravimetric analysis (TGA)  $[(\text{H}_2\text{dap}^+)_2(\text{tda}^{2-})] \cdot 2\text{H}_2\text{O}$  (**2**).

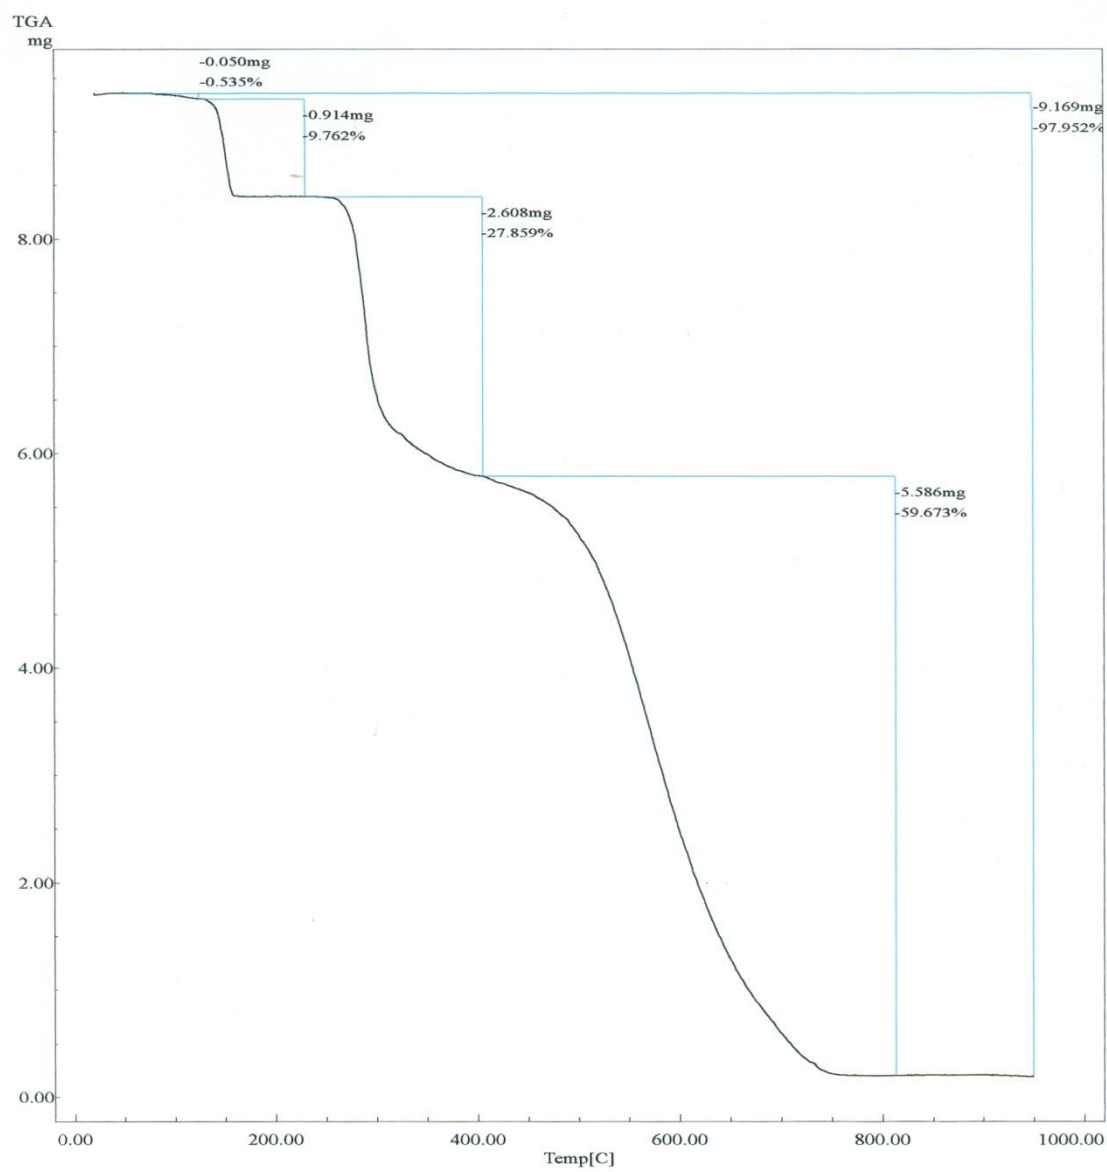

### S5.2. FT-IR spectra of standard gases to identify evolved gases in TGA of 2.

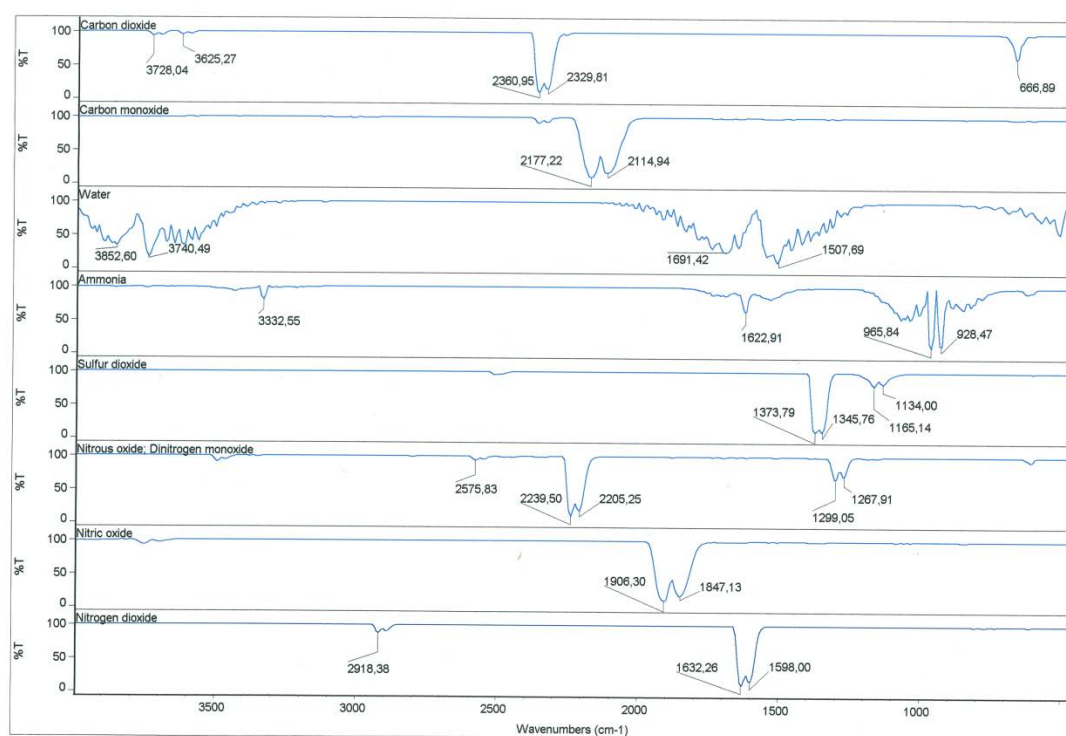

### S5.3. Time-spaced FT-IR spectra to identify the evolved gases in the TGA of 1.

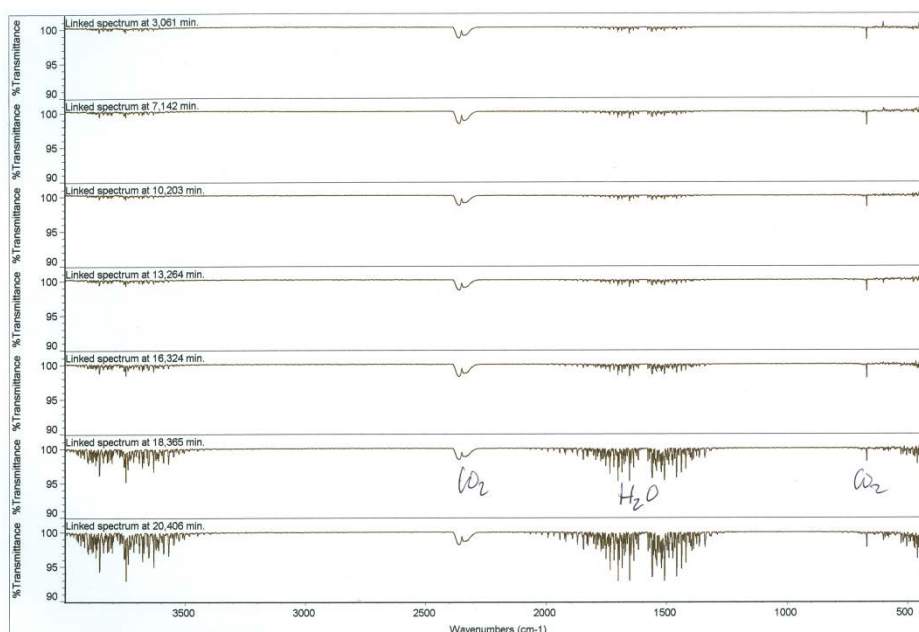

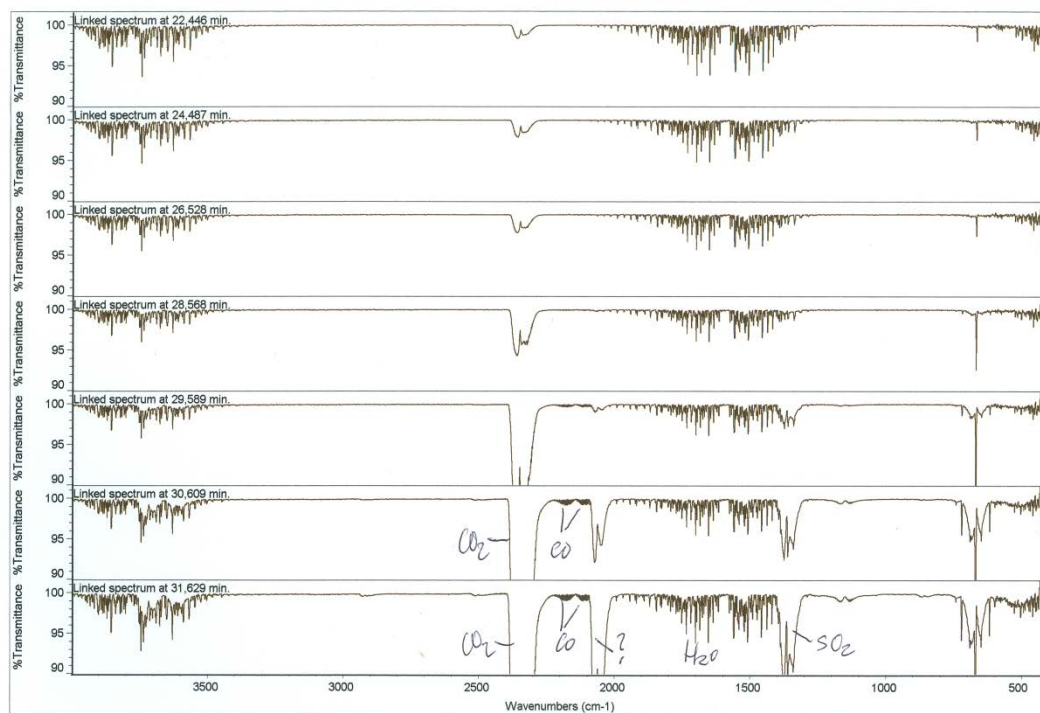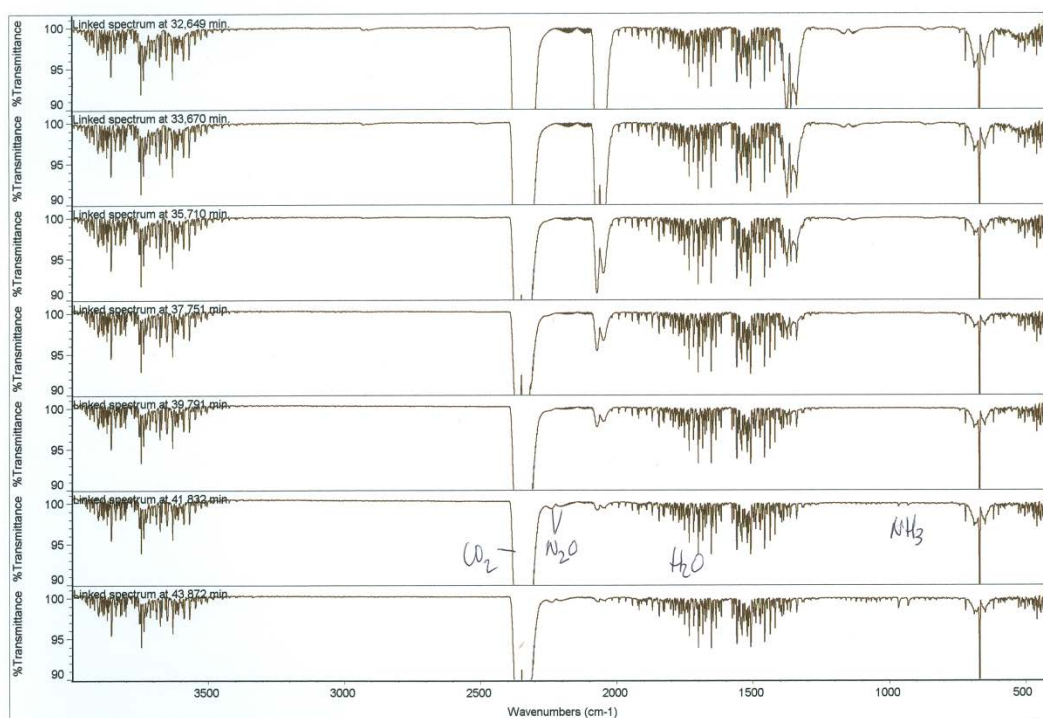

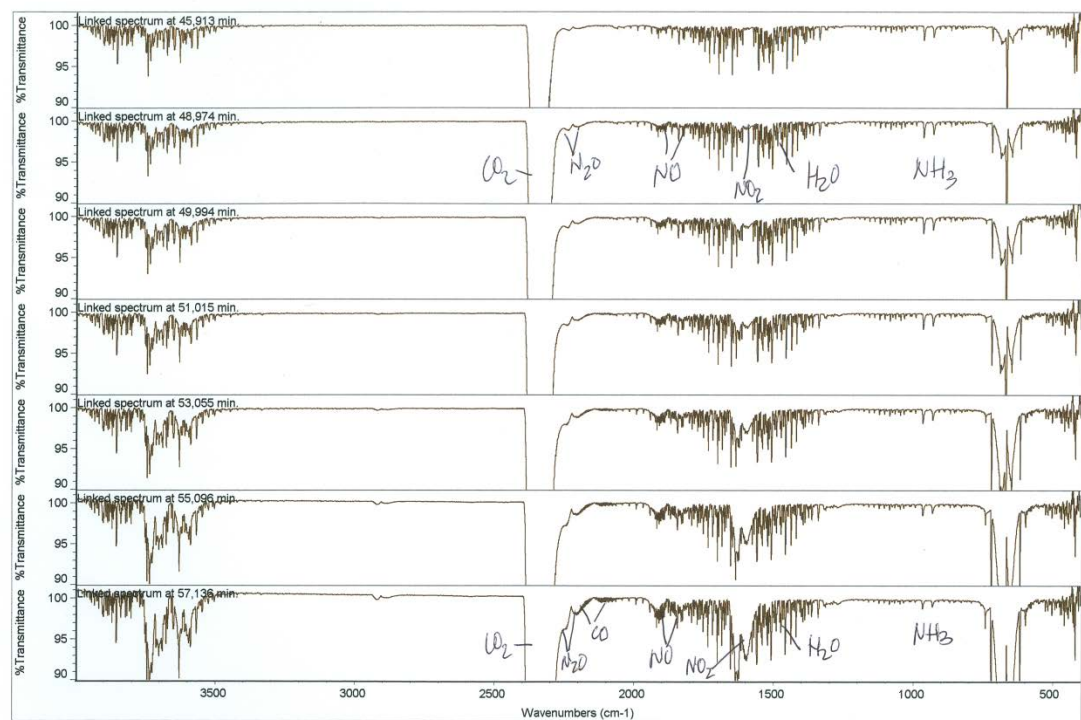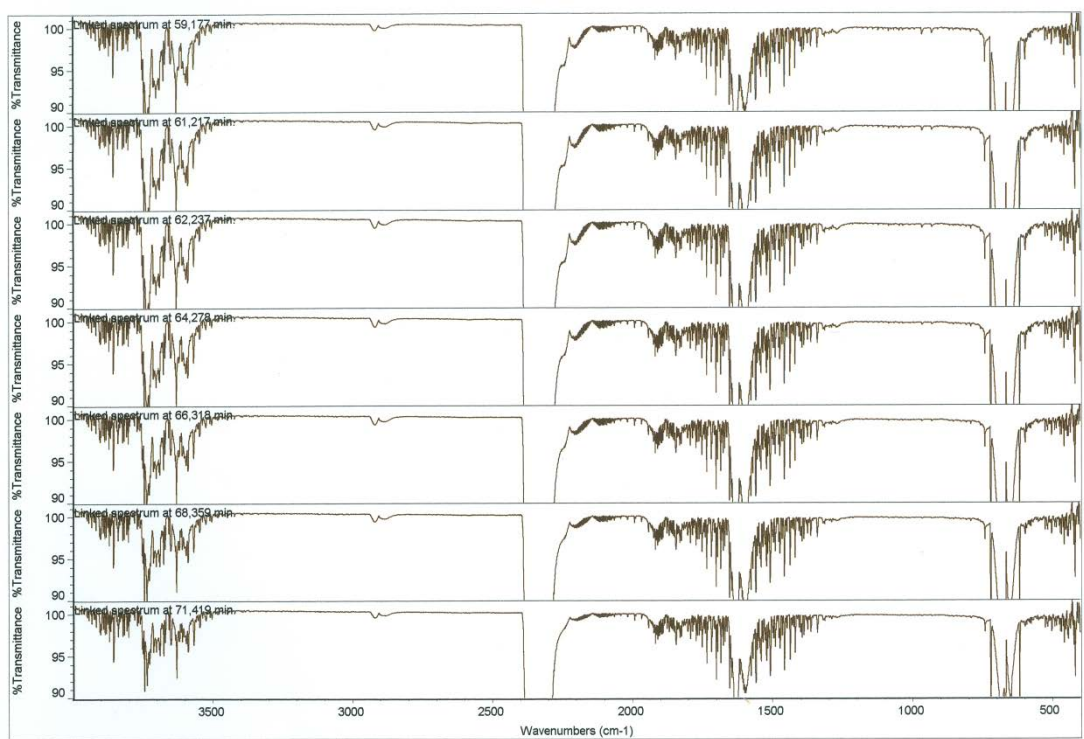



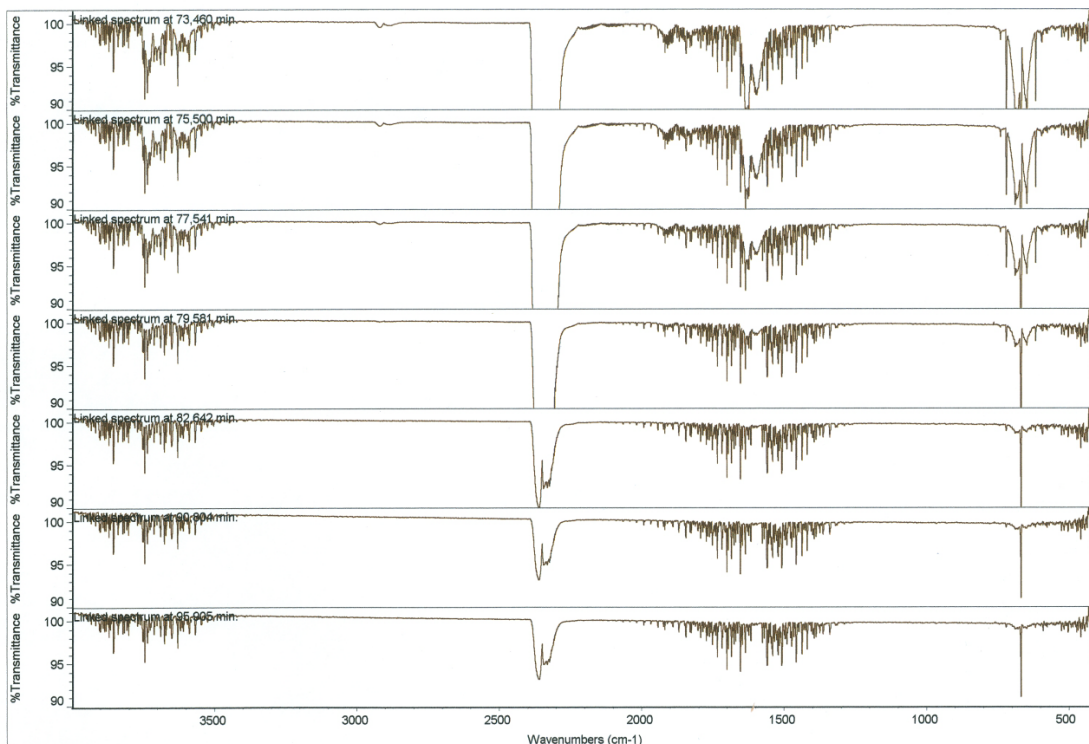

12

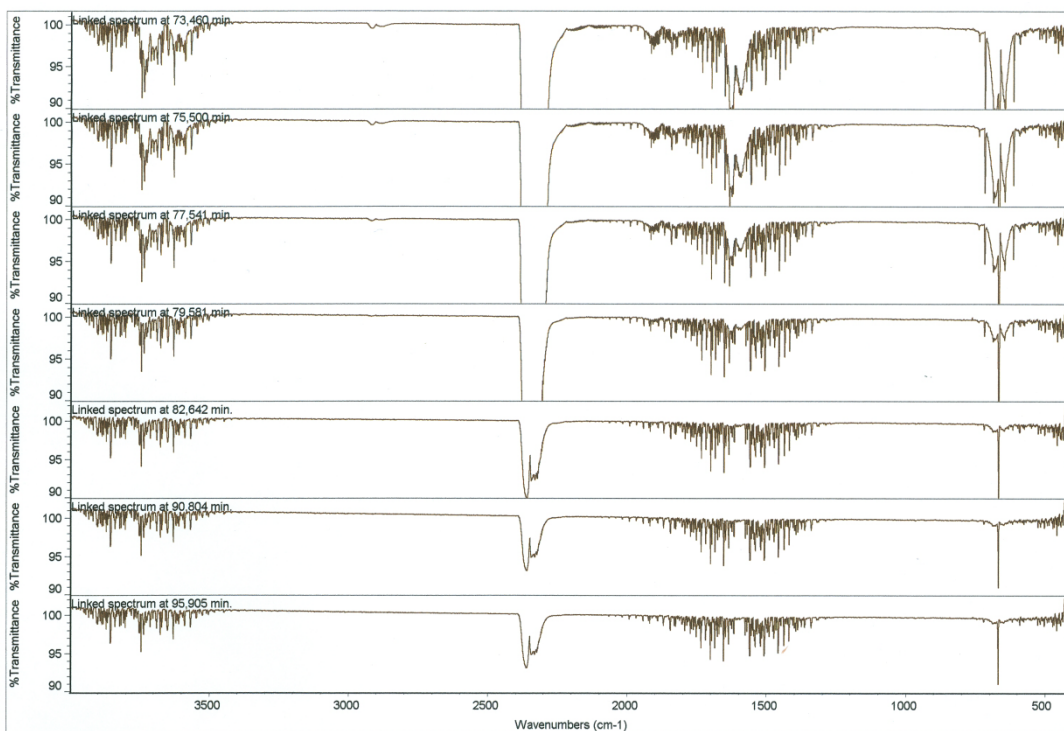

**S5.4.** Selected FT-IR spectra to identify the evolved gases in the TGA of **2**.  
Second (up) and third (down) steps.



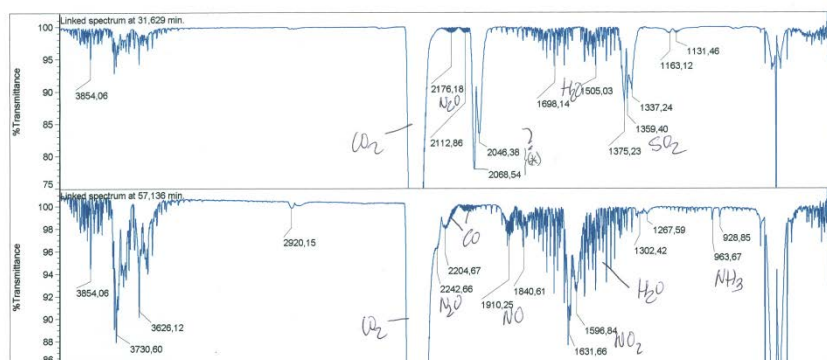

### S5.5 Summary of results and Comments on TGA of **2**.

| Step    | Temperature<br>°C | Time<br>min | Lost weight (%) |                 | Gases or final residue                                                                             |
|---------|-------------------|-------------|-----------------|-----------------|----------------------------------------------------------------------------------------------------|
|         |                   |             | Observed        | Calculated      |                                                                                                    |
| 0       | r.t.- <b>135</b>  | 0-12        | 0.535           | <i>Humidity</i> | H <sub>2</sub> O, CO <sub>2</sub> (t*)                                                             |
| 1       | <b>135-180</b>    | 12-18       | 9.762           | 7.047           | 2 H <sub>2</sub> O, CO <sub>2</sub> (t*)                                                           |
| 2       | <b>180-400</b>    | 18-39       | 27.859          | 30.452          | H <sub>2</sub> O, CO <sub>2</sub> , CO, X**, SO <sub>2</sub>                                       |
| 3       | <b>400~800</b>    | 39-82       | 59.673          | 62.142          | H <sub>2</sub> O, CO <sub>2</sub> , CO,<br>NH <sub>3</sub> , N <sub>2</sub> O, NO, NO <sub>2</sub> |
| Residue | <b>950</b>        | 93          | 2.048           | 0               | Undetermined                                                                                       |

\*t = Trace amounts. \*\* X = Unidentified gas.

#### Comments:

At the outset, the analyzed sample of compound **2** (9.361 mg) registers a minimal weight loss (referred to as step 0, possibly attributable to moisture < 0.6%). The thermal breakdown of compound **2** primarily commences by eliminating its tightly bound water content (termed step 1, 135-180°C, calculated for two water molecules only). Subsequently, the organic combustion takes place across two new steps. The first stage (step 2, 180-400°C) shows a weight loss closely aligning with the anticipated value for the combustion of the tda<sup>2-</sup> ion (30.45%), with the evolved gasses reasonably corroborating this process. Notably, an unidentified gas 'X' is released during this stage, a phenomenon also observed in the thermogravimetric analysis of free H<sub>2</sub>tda acid (not presented here). The weight loss in the final step 3 (400-800°C) similarly matches the estimated value for two H<sub>2</sub>dap<sup>+</sup> ions (62.142%). Once more, the evolved gasses align with these observations. Collectively, these steps result in a residual mass of 2% (at 900°C). The cumulative weight loss from steps 1-3, alongside the residual mass (at 950°C) nearly corresponds to the total sample weight projected for compound **2** (excluding moisture), accounting for approximately 99.342%.

## S.6. Thermogravimetric analyses (TGA) of used reagents in this work.

### S6.1. TGA of 2,2'-Thiodiacetic acid, H<sub>2</sub>tda (powder sample, 98%).

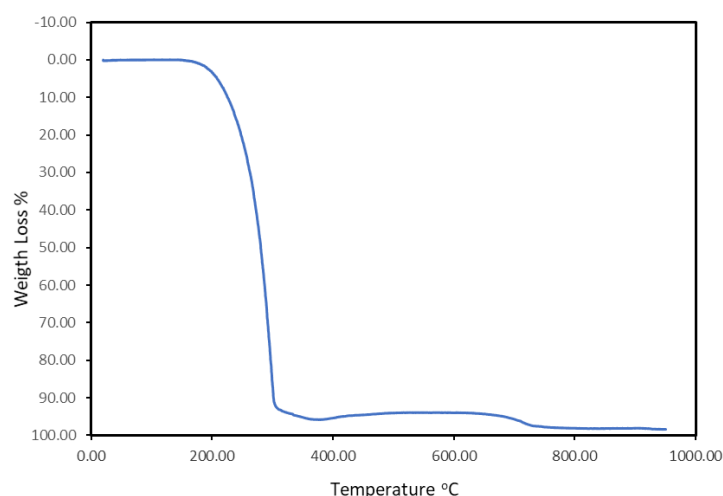

| Step/Residue | Temperature °C | Time min | Weight* (%) | Gases or Residue (R)                                                                               |
|--------------|----------------|----------|-------------|----------------------------------------------------------------------------------------------------|
| 1            | 130-325        | 12-31    | -93.886     | H <sub>2</sub> O, CO <sub>2</sub> , CO, SO <sub>2</sub> , CS <sub>2</sub> , X**                    |
| 2            | 325-380        | 31-36    | -1.851      | H <sub>2</sub> O, CO <sub>2</sub> , CO, H <sub>2</sub> CO, SO <sub>2</sub> , CS <sub>2</sub> , X** |
| R-380        | 380            | 36       | -4.263      |                                                                                                    |
| 3            | 380-550        | 36-54    | + 1.855     | H <sub>2</sub> O, CO <sub>2</sub> , CO, H <sub>2</sub> CO, SO <sub>2</sub> , CS <sub>2</sub> , X** |
| 4            | 550-830        | 54-83    | -1.222      | H <sub>2</sub> O, CO <sub>2</sub> , CO, H <sub>2</sub> CO, SO <sub>2</sub>                         |
| R-830        | 830            | 83       | -1.89       | Unidentified                                                                                       |
| R-950        | 950            | 93       | -1.64       | Unidentified                                                                                       |

\*Lost (–) or gained (+) weight. \*\* Unidentified gas.

#### Comments:

The TGA analysis of this compound reveals an initial step with a weight loss of approximately 94%, where the formation of CS<sub>2</sub> and SO<sub>2</sub> was identified as sulfur-gases. The observed saw-tooth pattern in the first derivative of the weight loss plot versus temperature aligns with the reported melting point for this acid (128-131°C). In the subsequent step, the presence of formalin was also noted. The remaining material (~ 4.2%) shows an increase in weight before undergoing further decomposition resulting in a final residue of less than 2%, which aligns well with the claimed purity stated by the supplier.

**Selected reference:** Vinciguerra, V., Bucci, R., Marini, F., Napoli, A., Thermal behaviour of iminodiacetic, oxydiacetic and thiodiacetic acids. *J. Therm. Anal. Calorim.* **2006**, 83, 475–478. <https://doi.org/10.1007/s10973-005-6939-6>

**S6.2.** TGA of 2,6-diaminopurine, Hdap (powder sample, 98%).

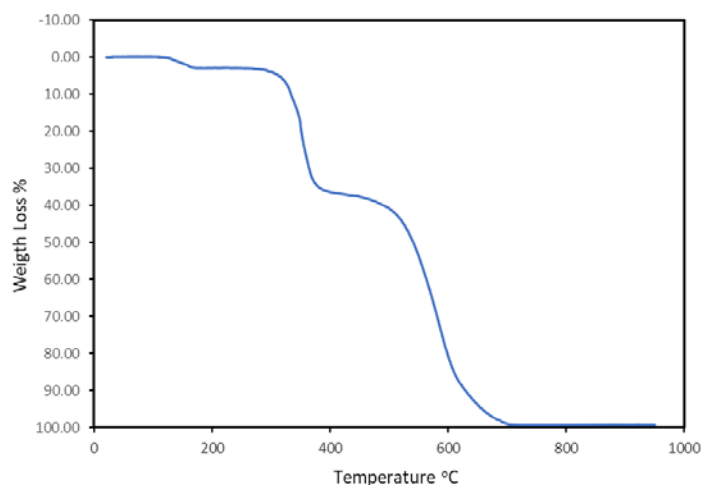

| Step/Residue | Temperature °C | Time min | Weight* (%) | Gases or Residue (R)                                                                               |
|--------------|----------------|----------|-------------|----------------------------------------------------------------------------------------------------|
| 1            | 115-220        | 9-16     | – 3.119     | H <sub>2</sub> O, CO <sub>2</sub> (t),                                                             |
| 2            | 240-335        | 16-33    | – 9.097     | H <sub>2</sub> O, CO <sub>2</sub>                                                                  |
| 3            | 335-435        | 36-54    | – 25.226    | H <sub>2</sub> O, CO <sub>2</sub> , CO(t), NH <sub>3</sub> , N <sub>2</sub> O                      |
| 4            | 435-775        | 54-83    | – 61.288    | H <sub>2</sub> O, CO <sub>2</sub> , CO(t), NH <sub>3</sub> , N <sub>2</sub> O, NO, NO <sub>2</sub> |
| R-830        | 775            | 83       | 0.712       | Unidentified                                                                                       |

\*Lost (–) or gained (+) weight.

**Comments:**

The initial step primarily exhibits water loss (along with some CO<sub>2</sub>). The second step begins above 240°C, without notable production of N-gases. The weight loss becomes substantial in this phase about 300 °C, in line with its reported melting point (302°C). Subsequent steps generate water, CO<sub>2</sub>, some CO, NH<sub>3</sub> and N-oxides. Our findings also demonstrate that steps 3 and 4 (> 85% of weight loss) notably generate N-gases (including ammonia) and result in < 1% residue. As a result, we infer that the sample under study contains approximately 3% water.

### S6.3. TGA of N9-(2-hydroxyethyl)adenine, 9heade (powder sample, 98%).

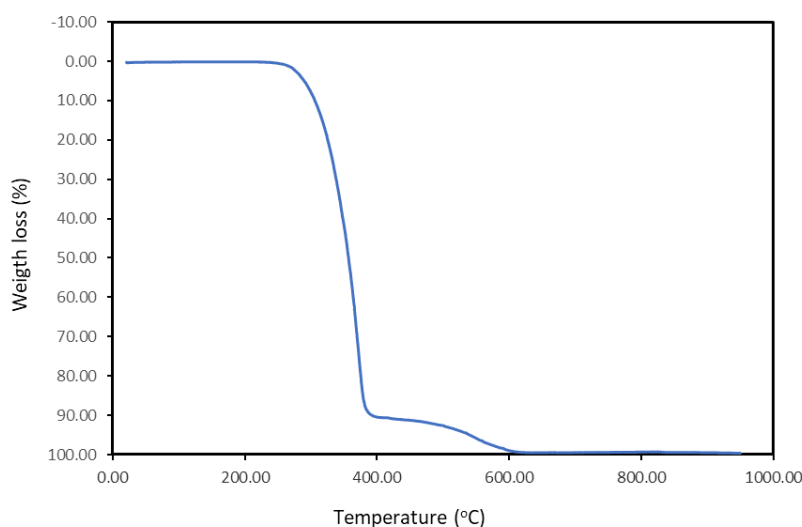

| Step/Residue | Temperature °C | Time min | Weight* (%) | Gases or Residue (R)                                                                                  |
|--------------|----------------|----------|-------------|-------------------------------------------------------------------------------------------------------|
| 1            | 215-420        | 18-39    | – 96.431    | H <sub>2</sub> O, CO <sub>2</sub> , CO, N <sub>2</sub> O (t)                                          |
| 2            | 420-625        | 39-63    | – 3.380     | H <sub>2</sub> O, CO <sub>2</sub> , CO(t), N <sub>2</sub> O, NO,NO <sub>2</sub>                       |
| R-625        | 625            | 63       | 0.176       | Unidentified                                                                                          |
| 3            | 625-950        | 63-95    | 0.679       | H <sub>2</sub> O, CO <sub>2</sub> , CO(t), N <sub>2</sub> O, NO,NO <sub>2</sub> , SO <sub>2</sub> (i) |
| R-950        | 950            | 95       | 0.855       | Unidentified                                                                                          |

\*Lost (–) or gained (+) weight. (t) = Small quantity. (i) Unexpected gas, attributed to impurity.

#### Comments:

The vast majority of the sample (>96%) undergoes melting and decomposition in the initial step, aligning well with the reported melting point for 9heade (243°C). Once again, the saw-tooth pattern in the first derivative of the weight loss plot versus temperature concurs with the reported melting point for this synthetic purine nucleoside (242 or 240-244°C). The resulting material undergoes nearly complete decomposition resulting in a residue (<0.2%) at 625°C. This residual material further gains weight, culminating in a final residue of <1% at 950°C. Additionally, during this last step, the production of SO<sub>2</sub> from an impurity or contaminant is observed. Nevertheless, our findings align with the supplier's guaranteed purity (98%). Interestingly, no ammonia is detected among the evolved gases, in contrast to the typical presence observed in the TGA of adenine or 2,6-diaminopurine (see S6.2) and near all of its metal complexes.

**S7.** DSC curve for [(H9Heade<sup>+</sup>)(Htda<sup>-</sup>)], **1**.

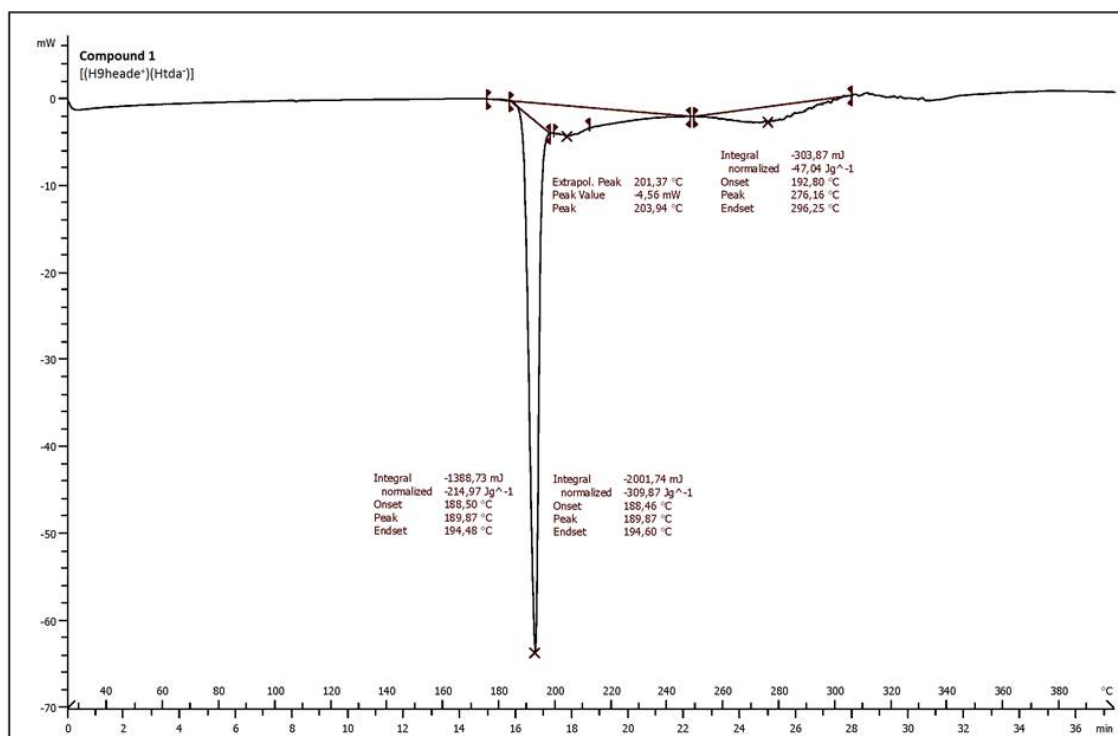

**S8.** DSC curve for  $[(\text{H}_2\text{dap}^+)_2(\text{tda}^{2-})] \cdot 2\text{H}_2\text{O}$ , **2**.

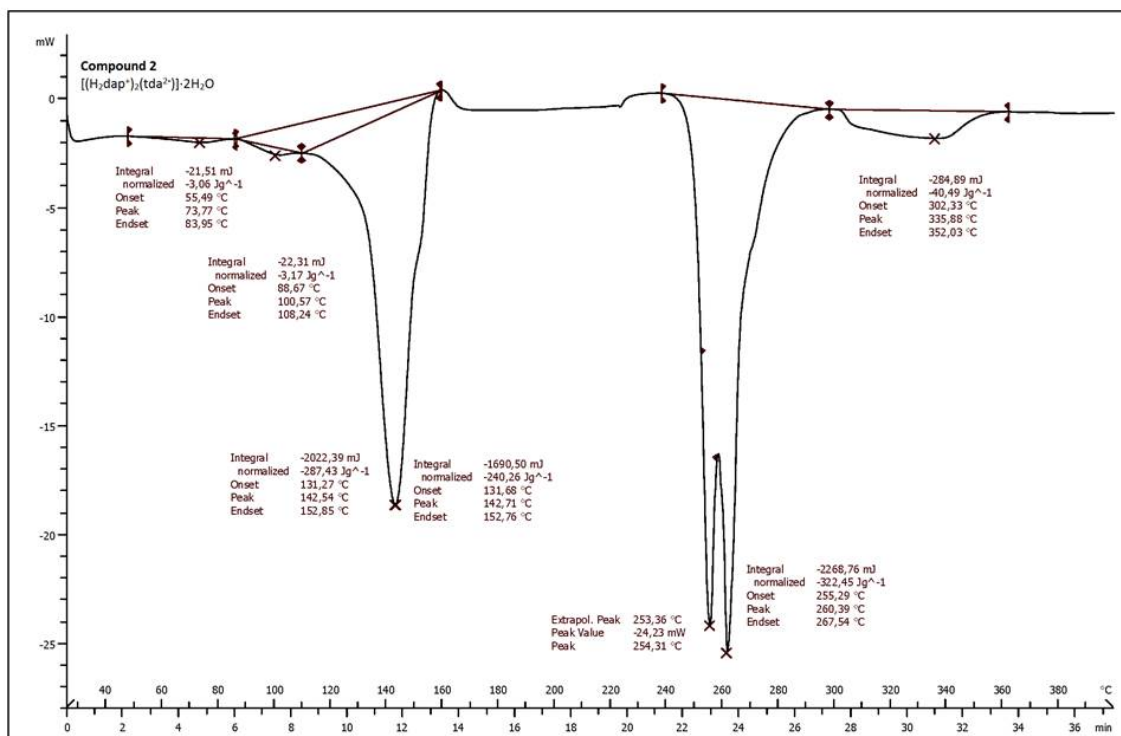



**S9.**  $^1\text{H}$  NMR spectrum in  $\text{D}_2\text{O}$  of **1**.

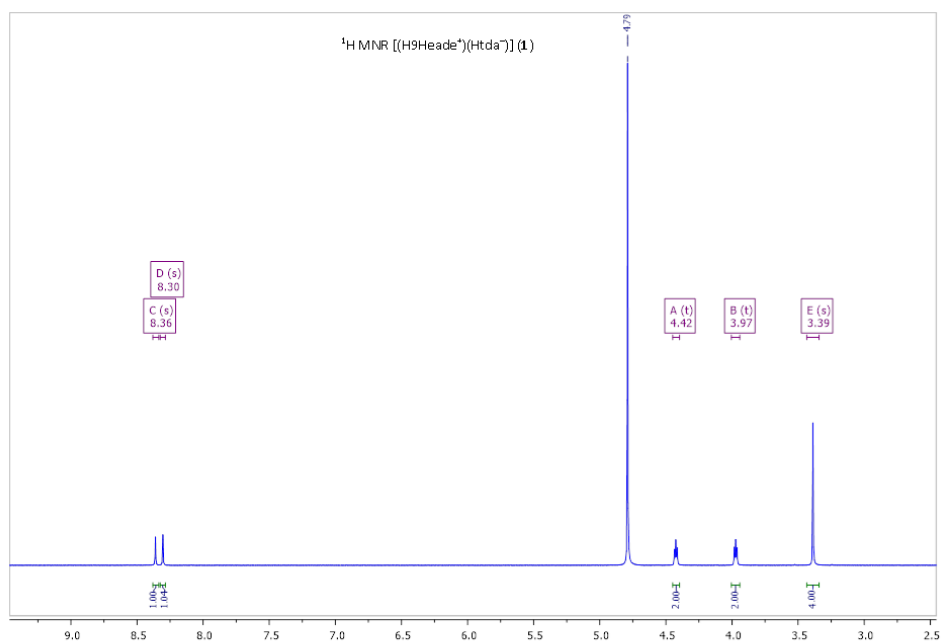

**S10.**  $^1\text{H}$  NMR spectrum in  $\text{D}_2\text{O}$  of **2**.

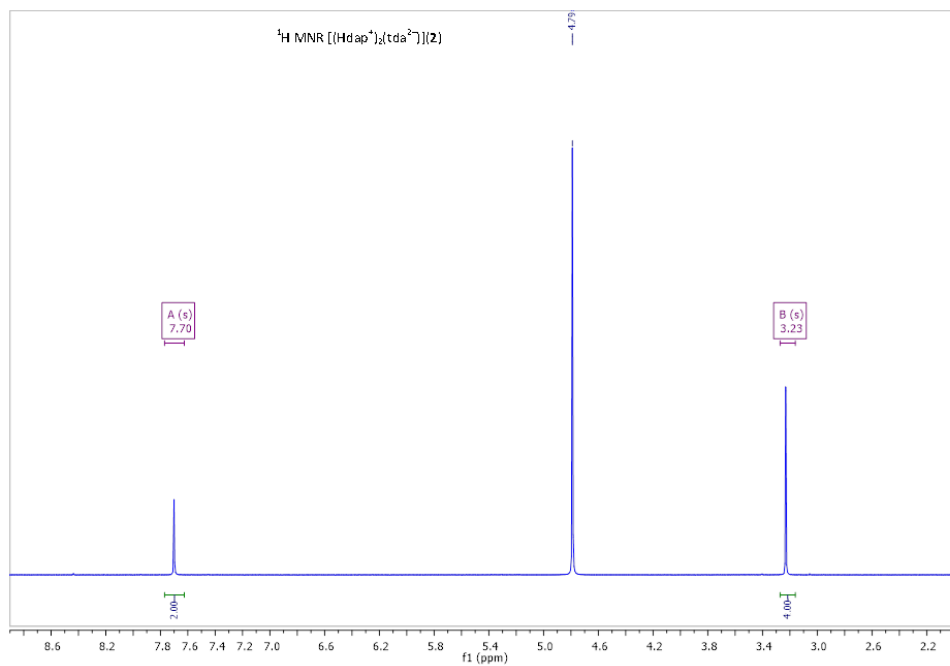

**S11.**  $^{13}\text{C}$  NMR spectrum in  $\text{D}_2\text{O}$  of **1**.

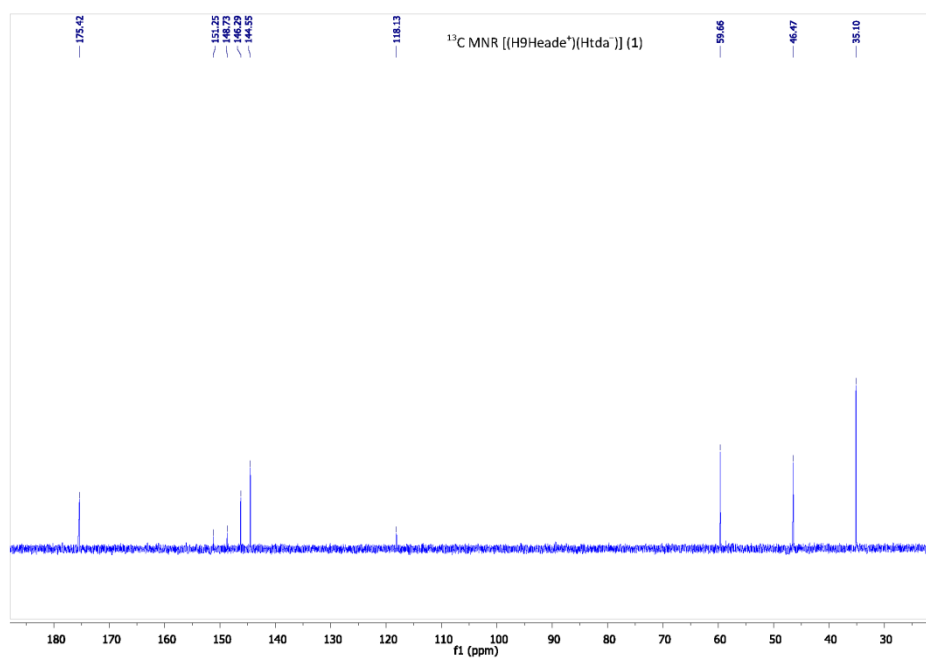

**S12.**  $^{13}\text{C}$  NMR spectrum in  $\text{D}_2\text{O}$  of **2**.

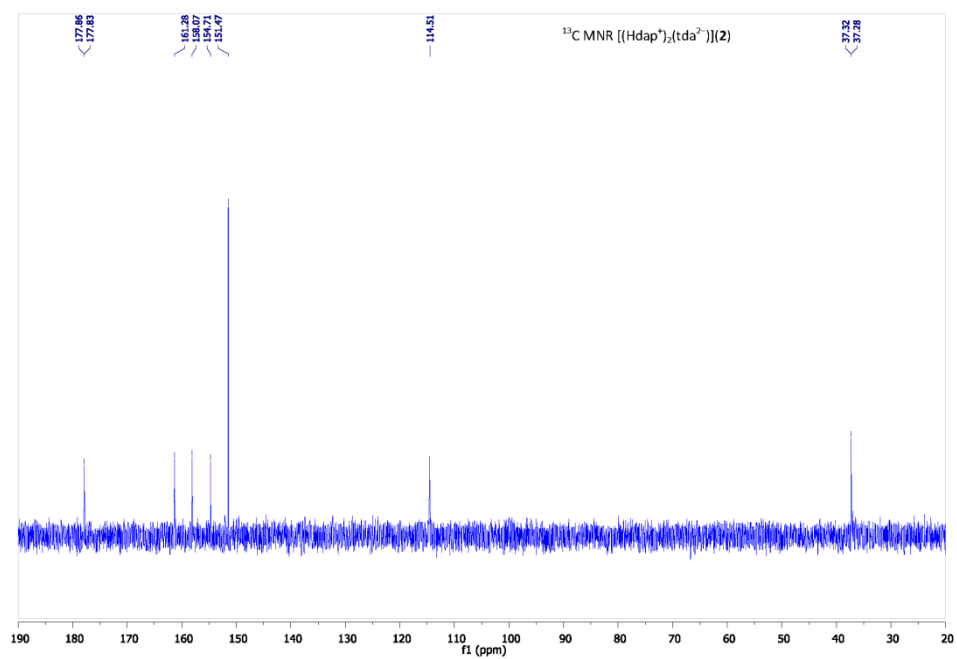

Supplement: s1 [file s1]
